# Supplementary material for: Energy transfer pathways in the carbazole functionalized β-diketonate europium complexes
Source: Royal Society of Chemistry journal article supplement (doi:10.1039/b705666d), 2007-01-01
Supplement: b705666d.pdf [file b705666d.pdf]

## Energy Transfer Pathways in the Carbazole Functionalized $\beta$ -Diketonate Europium Complexs

Daobo Nie,<sup>a</sup> Zhuqi Chen,<sup>a</sup> Zuqiang Bian,\*<sup>a</sup> Jianqiang Zhou,<sup>b</sup> Zhiwei Liu,<sup>a</sup> Fangfang Chen,<sup>a</sup>  
Yongliang Zhao<sup>b</sup> and Chunhui Huang\*<sup>a</sup>

<sup>a</sup> Beijing National Laboratory for Molecular Sciences, State Key Laboratory of Rare Earth Materials Chemistry and Applications, College of Chemistry and Molecular Engineering, Peking University, Beijing, 100871, P. R. China.

<sup>b</sup> College of Chemistry and Chemical Engineering, Inner Mongolia University, Hohhot, 010021, P. R. China.

Fax: +86-10-62757156

E-mail: [chhuang@pku.edu.cn](mailto:chhuang@pku.edu.cn)

### Electronic Supplementary Information

#### 1. <sup>1</sup>H NMR Data of CDBM and CCDBM.

*CDBM*: <sup>1</sup>H NMR (CDCl<sub>3</sub>, TMS):  $\delta$ (ppm) 6.95 (s, 1H), 7.32 (t, 2H, J=7.14, 7.21Hz), 7.44 (t, 2H, J=8.03, 7.17Hz), 7.52 (t, 4H, J=9.33, 8.12Hz), 7.59 (t, 1H, J=7.23, 7.32Hz), 7.73 (d, 2H, J=8.47Hz), 8.03 (d, 2H, J=7.19Hz), 8.15 (d, 2H, J=7.72Hz), 8.23 (d, 2H, J=8.54Hz), 16.93 (s, 1H).

*CCDBM*: <sup>1</sup>H NMR (CDCl<sub>3</sub>, TMS):  $\delta$ (ppm) 5.59 (s, 2H), 6.76 (s, 1H), 7.24 (d, 2H, J=10.58Hz), 7.28 (d, 2H, J=7.21Hz), 7.34 (d, 2H, J=8.18Hz), 7.45 (m, 4H, J=8.28, 7.02, 7.76Hz), 7.54 (t, 1H, J=6.01, 8.53Hz), 7.88 (d, 2H, 6.64Hz), 7.93 (d, 2H, J=7.11Hz), 8.14 (d, 2H, J=8.64Hz), 17.05 (s, 1H).

#### 2. Absorption spectra of the three ligands and the corresponding Eu<sup>3+</sup> complexes recorded in dichloromethane.

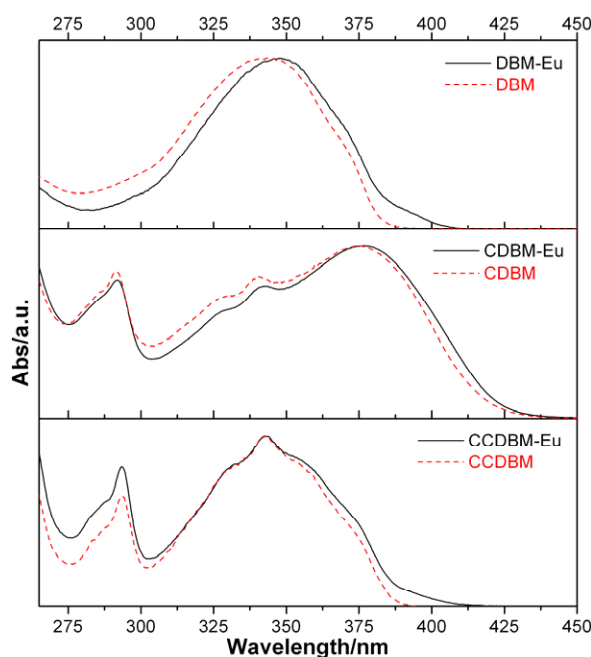

**Fig. S1.** Absorption spectra of the three ligands and the corresponding Eu<sup>3+</sup> complexes recorded in

dichloromethane. Red dashed line: free ligands; Black solid line: complexes.

### 3. The corrected emission spectra of the three complexes in solid state.

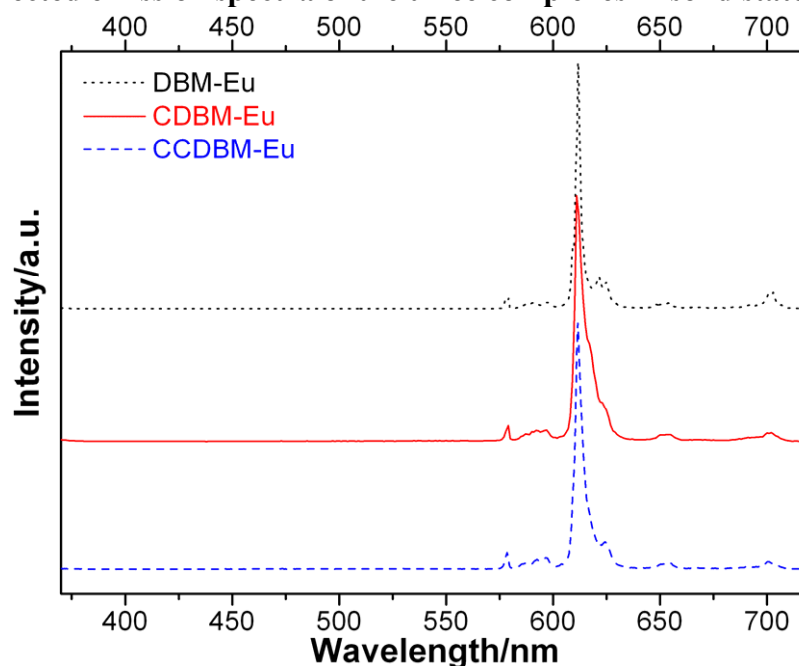

Fig. S2. The corrected emission spectra of the three complexes in solid state.

### 4. The Element Analysis of the Complexes

Table S1. Element Analysis Results of the Complexes

|                                           |       | C%    | H%   | N%   |
|-------------------------------------------|-------|-------|------|------|
| Eu(DBM) <sub>3</sub> ·2H <sub>2</sub> O   | Calc. | 63.01 | 4.35 |      |
|                                           | Found | 63.10 | 4.39 |      |
| Gd(DBM) <sub>3</sub> ·2H <sub>2</sub> O   | Calc. | 62.63 | 4.32 |      |
|                                           | Found | 62.71 | 4.30 |      |
| Eu(CDBM) <sub>3</sub> ·2H <sub>2</sub> O  | Calc. | 71.89 | 4.32 | 3.10 |
|                                           | Found | 71.46 | 4.22 | 2.84 |
| Gd(CDBM) <sub>3</sub> ·2H <sub>2</sub> O  | Calc. | 71.61 | 4.30 | 3.09 |
|                                           | Found | 71.77 | 4.26 | 2.90 |
| Eu(CCDBM) <sub>3</sub> ·2H <sub>2</sub> O | Calc. | 72.30 | 4.62 | 3.01 |
|                                           | Found | 72.30 | 4.46 | 3.17 |
| Gd(CCDBM) <sub>3</sub> ·2H <sub>2</sub> O | Calc. | 72.03 | 4.61 | 3.00 |
|                                           | Found | 72.05 | 4.58 | 3.19 |

### 5. The Calculations of the Rate Constants in Fig. 7.

5.1.  $k_{flu}$ .  $k_{flu}$  is calculated according to Equation S1:

$$k_{flu} = \frac{\phi_f}{\tau_f} \quad (S1)$$

The calculation results are summarized in Table S2.

**Table S2. The Fluorescence Rate Constants  $k_{\text{flu}}$  of CDBM in  $\text{Eu}(\text{CDBM})_3 \cdot 2\text{H}_2\text{O}$  Complex**

| solvents                 | $\phi_f$ | $\tau_f/\text{ns}$ | $k_{\text{flu}}/10^7$ |
|--------------------------|----------|--------------------|-----------------------|
| acetonitrile             | 0.013    | 3.93               | 0.3                   |
| acetone                  | 0.041    | 5.33               | 0.8                   |
| $\text{CH}_2\text{Cl}_2$ | 0.062    | 5.55               | 1.1                   |
| $\text{CHCl}_3$          | 0.094    | 3.13               | 3.0                   |
| THF                      | 0.054    | 1.89               | 2.9                   |
| aether                   | 0.006    | 0.17               | 3.5                   |
| toluene                  | 0.009    | 0.12               | 7.5                   |
| cyclohexane              | 0.0008   | 0.03               | 2.7                   |

**5.2.  $k_T$ .**  $k_T$  is determined from the phosphorescence lifetime of  $\text{Gd}(\text{CDBM})_3 \cdot 2\text{H}_2\text{O}$  at 77K. This is just an approximation to the real  $k_T$  value with the assumption that all the non-radiative decays have been suppressed at 77K and that temperature effect is not significant for  $k_T$ . With equation S2 we can get  $k_T \approx 600$

$$k_T \approx \frac{1}{\tau_p} = \frac{1}{1.6 \times 10^{-3}} = 625 \quad (\text{S2})$$

**5.3.  $k_{\text{et}}$ .** Because the  $\text{Eu}^{3+}$  ion is sensitized through the triplet pathway in  $\text{Eu}(\text{CDBM})_3 \cdot 2\text{H}_2\text{O}$ , oxygen may compete with the sensitization process. However, deoxygenation of the  $\text{Eu}(\text{CDBM})_3 \cdot 2\text{H}_2\text{O}$  solutions did not intensify the  $\text{Eu}^{3+}$  luminescence intensity. This result indicates that  $k_{\text{et}}$  exceeds  $10^7 \text{ s}^{-1}$ .

**5.4.  $k_{\text{obs}}$ .**  $k_{\text{obs}}$  is calculated according to equation S3.

$$k_{\text{obs}} = \frac{1}{\tau_{Ln}} \quad (\text{S3})$$

$\tau_{Ln}$  is the observed lifetime of  $\text{Eu}^{3+}$  emission (Table 4 in the manuscript).

## 6. The Failure of Obtaining Single Crystals of the Complexes.

On referee asked why we failed to obtain the single crystal structures of the complexes. We want to clarify that we have tried all methods we knew to grow single crystals of the complexes. Unfortunately, for the well known reason (it is hard to grow single crystal for lanthanide complexes), we failed. However, because we only used the qualitative results obtained by the theoretical modeling in the discussion of energy transfer pathways, the theoretical modeling results are sufficient enough.

## References

- (1) Klink, S. I.; Grave, L.; Reinhoudt, D. N.; van Veggel, F. C. J. M.; Werts, M. H. V.; Geurts, F.

# Supplementary Material (ESI) for New Journal of Chemistry  
# This journal is (c) The Royal Society of Chemistry and  
# The Centre National de la Recherche Scientifique, 2007

A. J.; Hofstraat, J. W. *J. Phys. Chem. A* **2000**, *104*, 5457.
